# Supplementary material
Source: PubMed Central journal article supplement (PMC8556349)
Supplement: NIHMS1737706-supplement-Supplementary_Information.pdf [file NIHMS1737706-supplement-Supplementary_Information.pdf]

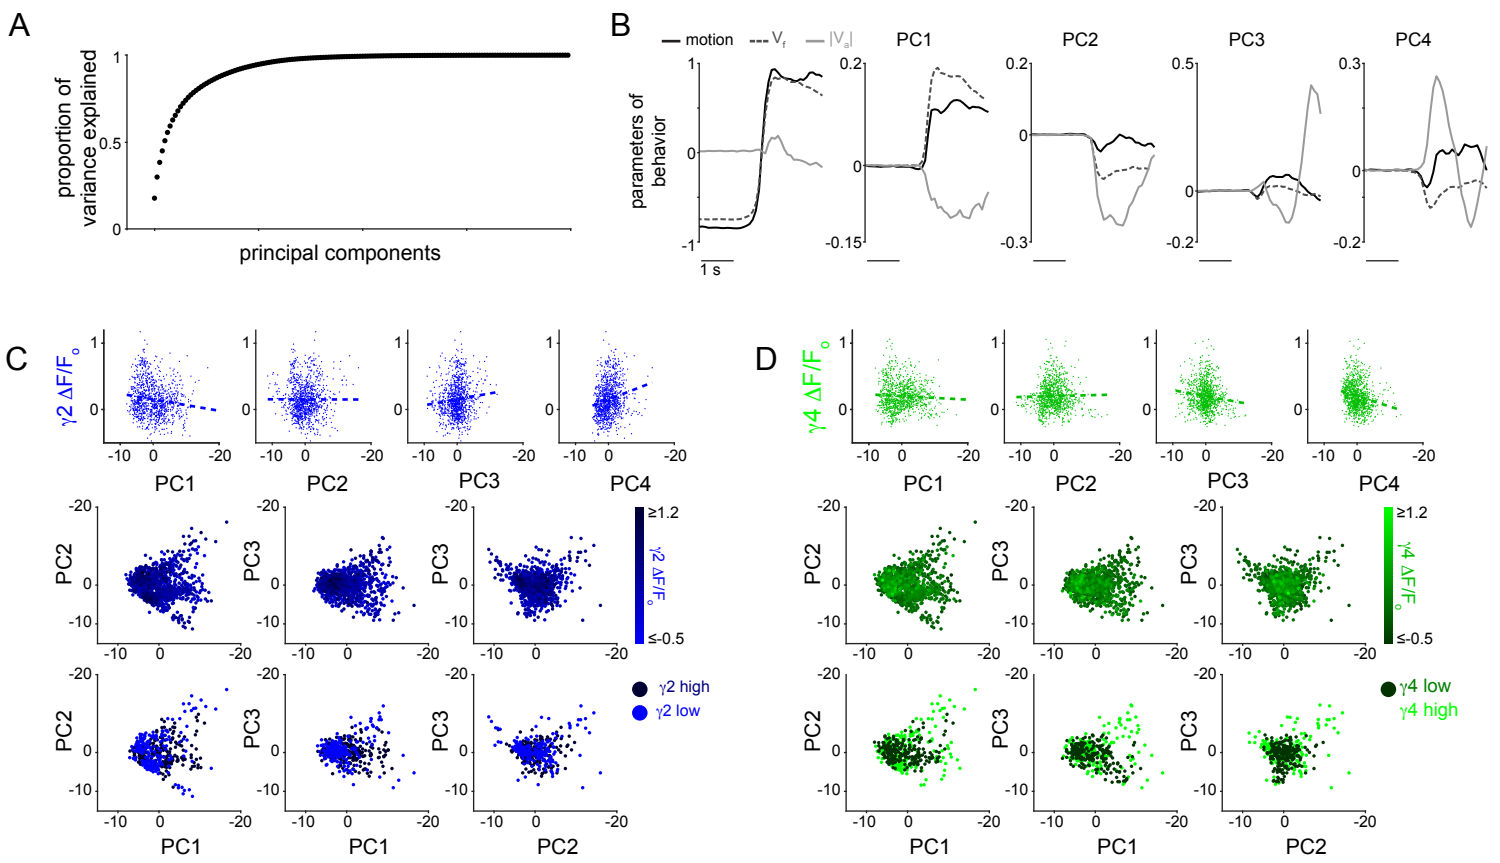

**Supplementary Figure 1. Principal component analysis (PCA) of behavioral variables during the onset of movement.** PCA was performed on net motion, forward velocity, [angular velocity], and [lateral velocity] across a 4 second time window centered on instances of movement initiation (4 variables  $\times$  4 sec time window  $\times$  10Hz sampling = 160 initial variables per start). All behaviors were z-score normalized over the 4 sec window. **(A)** Proportion of variance explained by each additional principal component (PC) in the PCA. **(B)** Most significant PCs. Left panel: mean z-score normalized behavioral variables during movement onset. Right panels: top 4 PCs along which the behavioral data maximally vary. **(C)** and **(D)** Relationship between most significant PCs and  $\gamma_2$  (G) and  $\gamma_4$  (H)  $\Delta F/F_0$  (averaged during the 2 sec interval after movement onset). **(C)** Average  $\gamma_2 \Delta F/F_0$  as a function of the top four PCs (top row). All Pearson correlation coefficients are either weak ( $|r| < 0.2$ ) or not significant. Pairwise comparison of top three PCs as a function of  $\gamma_2 \Delta F/F_0$  for all movement initiations (middle row) and bouts with the highest and lowest 25% of  $\gamma_2 \Delta F/F_0$  (bottom row). **(D)** As in **(C)** but for  $\gamma_4$ . All Pearson correlation coefficients are either weak ( $|r| < 0.2$ ) or not significant. p values not adjusted with Bonferroni correction.

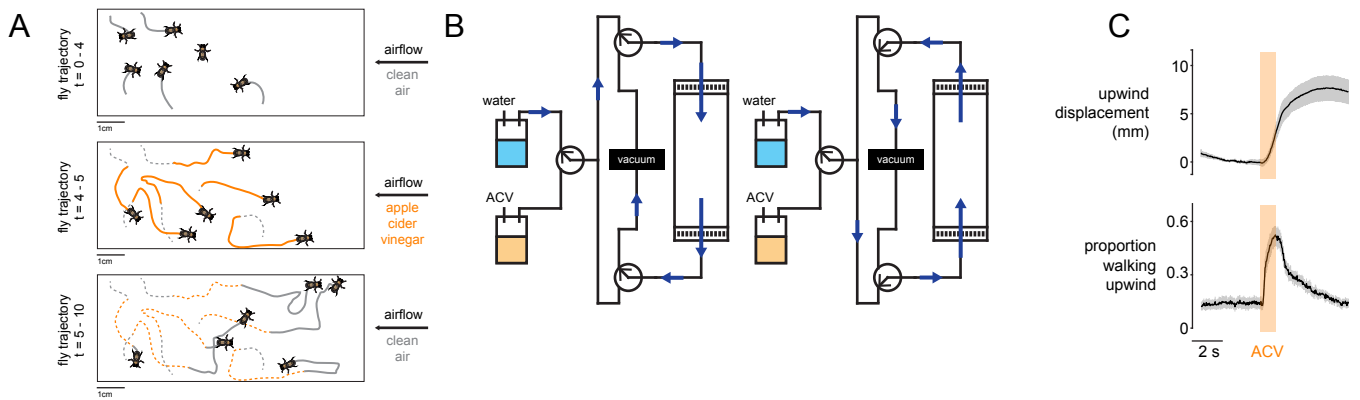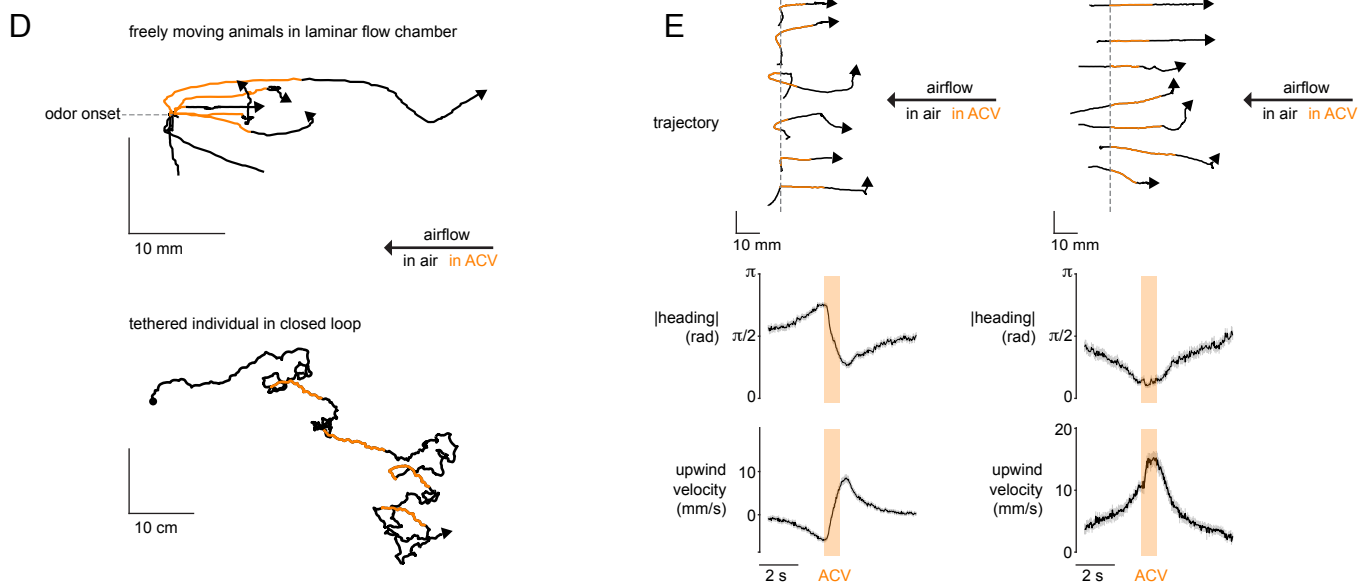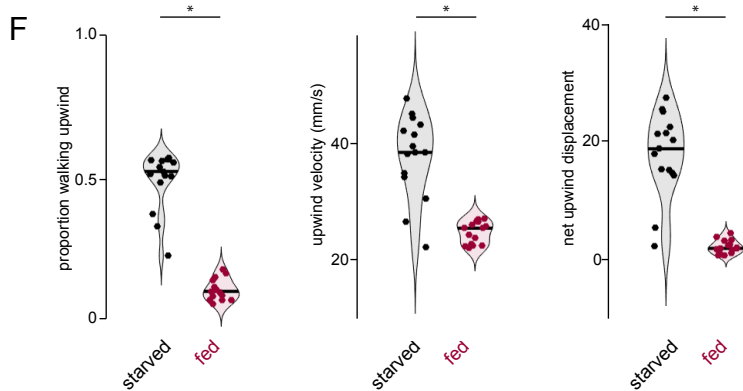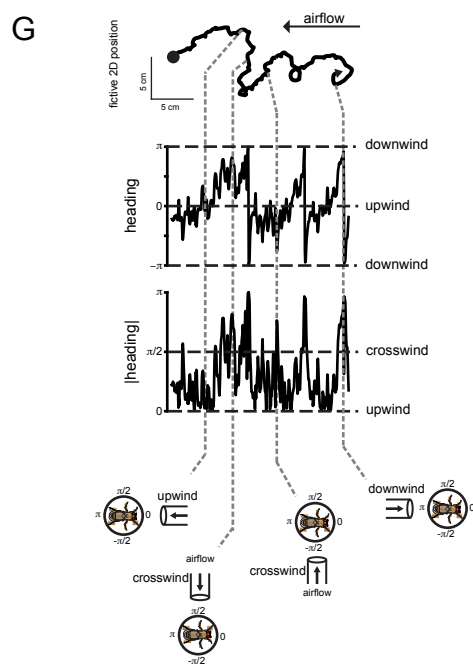

**Supplementary Figure 2. Behavioral responses to the appetitive food odor, apple cider vinegar, in closed-loop are similar to those in freely moving flies.** **(A)** Schematic of experimental paradigm in which the movements of a cohort of 5-7 flies in a laminar flow chamber were measured prior to, during, and after presentation of the appetitive food odor apple cider vinegar (ACV). **(B)** Schematic of laminar flow chamber and valve system to reverse the direction of air flow and ACV during alternating trials. **(C)** Average upwind displacement (top) and proportion of starved animals walking upwind (bottom)  $\pm$  95% confidence interval prior to, during (orange bar), and after a 1 sec pulse of ACV in the behavioral chamber aligned to the onset of odor. N=15 experiments using cohorts of 6 flies, 300 odor presentations. **(D)** Trajectories of freely moving and tethered flies during odor-gated anemotaxis. Top: untethered flies in the behavioral chamber aligned to a common origin at the onset of a 1 sec presentation of ACV (orange). Trajectories 1 sec before and 2 sec after odor are in black. Bottom: Fictive 2D trajectory of representative tethered fly walking in the closed-loop system in response to four 10-sec presentations of ACV over a 5 min trial. **(E)** Top: behavioral responses of individual flies to ACV walking crosswind (left, N=637) or upwind (right, N=224) at the time of odor onset. Bottom: average  $\pm$  95% confidence interval |heading| and upwind velocity aligned to odor onset (orange bar) for all flies. **(F)** Proportion of flies walking upwind (left), average upwind velocity (middle), and average net upwind displacement (right) of animals starved for 12-18 hours (black) and fed animals (maroon) during a 1 sec presentation of ACV. Unpaired two-sided t-test with Bonferroni correction,  $p < 10^{-4}$  (\*), see Supplementary Table 1. N=15 cohorts of 6 animals, 300 odor presentations. **(G)** Animal heading (middle) and |heading| (bottom) aligned to fictive 2D trajectory (top row) of a representative tethered individual walking in closed-loop paradigm. Bottom: the position of the air tube relative to tethered fly on the treadmill at indicated orientations.

### A low airflow

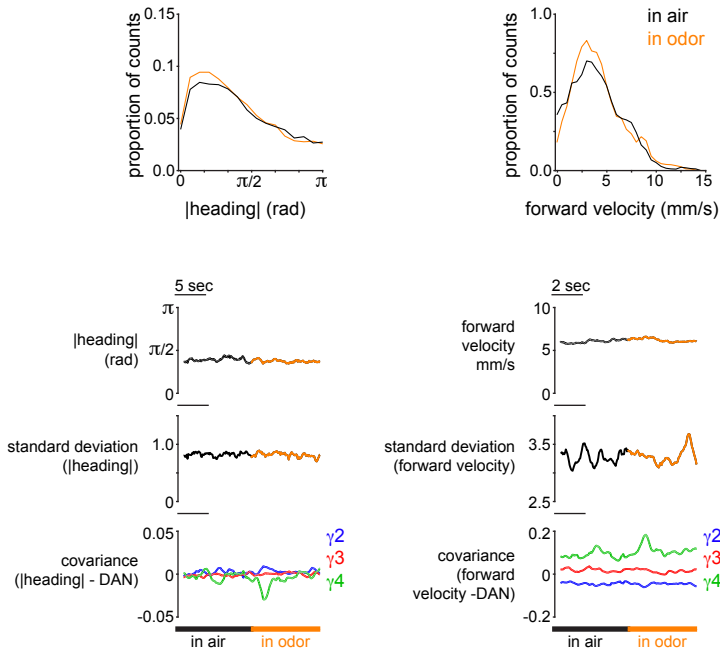

### B high airflow

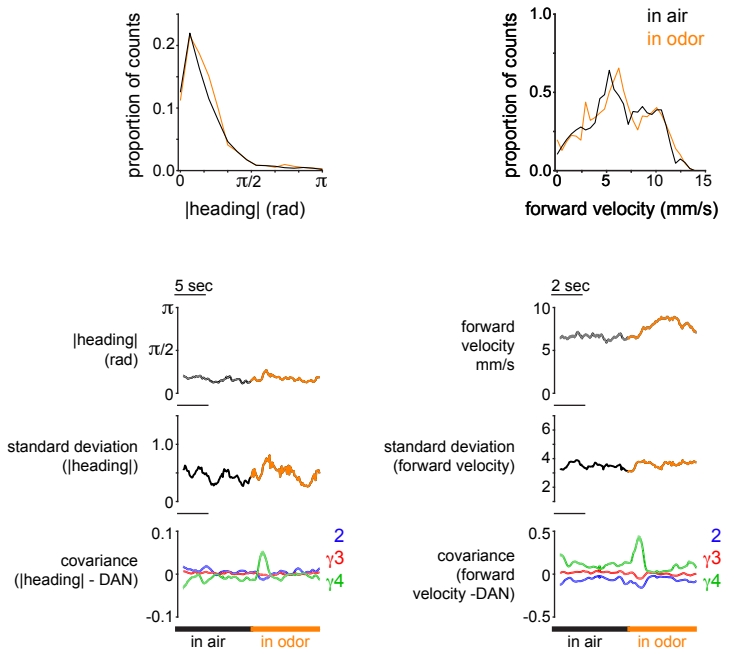

### C behavior in odor

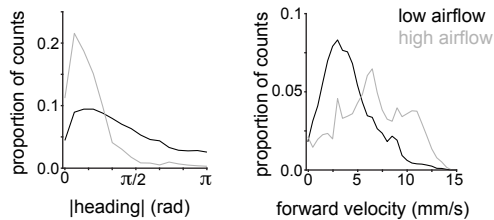

### D

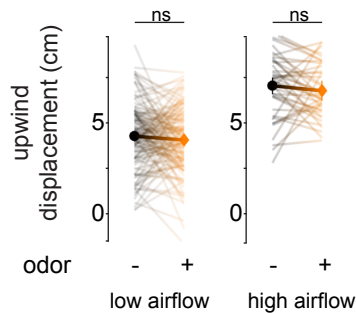

### E

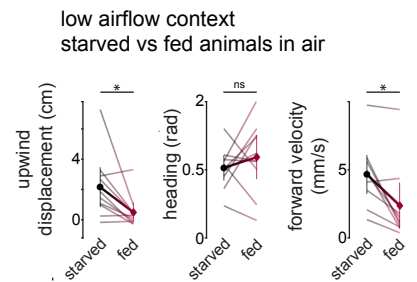

**Supplementary Figure 3. Comparison of behavior in high and low airflow, in clean air and odor.** (A) Top: distribution of time animals were oriented at a particular heading angle (left) or moved at a given forward velocity (right) in (orange) and out (black) of odor in the closed-loop paradigm under low airflow conditions. No significant difference in variance by 2-sampled F-test ( $p(|heading|) = 0.1318$ ;  $p(\text{forward velocity}) = 0.0508$ ). Bottom, left: average  $|heading|$  (top), standard deviation (SD) of  $|heading|$  (middle), and covariance of  $|heading|$  and DAN activity (bottom) at the onset of odor (low airflow conditions). Average  $|heading|$  and covariance plotted  $\pm$  95% confidence interval (obscured by the thickness of the data line). Increase in covariance corresponds to the initial reorientation of animals.  $N=26$  flies, 143 odor presentations. Right: same analysis as left but for forward velocity. (B) As in (A), but under high airflow conditions. Top: No significant difference in variance by 2-sampled F-test ( $p(|heading|) = 0.0991$ ;  $p(\text{forward velocity}) = 0.0764$ ). Bottom: the increase in covariance corresponds to the initial acceleration of animals in odor.  $N=22$  flies, 52 odor presentations. (C) Distribution of time tethered animals were oriented at a particular heading angle (left) or moved at a given forward velocity (right) in the closed-loop paradigm in the low (black) or high airflow (gray) context. Difference in variance in vs out of odor is significant by 2-sampled F-test ( $p(|heading|) < 0.0001$ ;  $p(\text{forward velocity}) < 0.0001$ ). (D) Average upwind displacement in (orange) and out (black) of odor in low (right) and high (left) airflow. No significant differences by paired t-test with Bonferroni correction. Low airflow:  $N=26$  flies, 143 odor presentations. High airflow:  $N=22$  flies, 52 odor presentations. (E) Upwind displacement (left), average  $|heading|$  (middle), and average forward velocity (left) of animals prior to (black, starved) and after (maroon, fed) a sucrose meal walking in odorless air (as in Figure 5B). Paired two-sided t-test with Bonferroni correction,  $p < 0.05$  (\*), see Supplementary Table 1.  $N=10$  flies, 102 bouts (49 before and 53 after feeding).

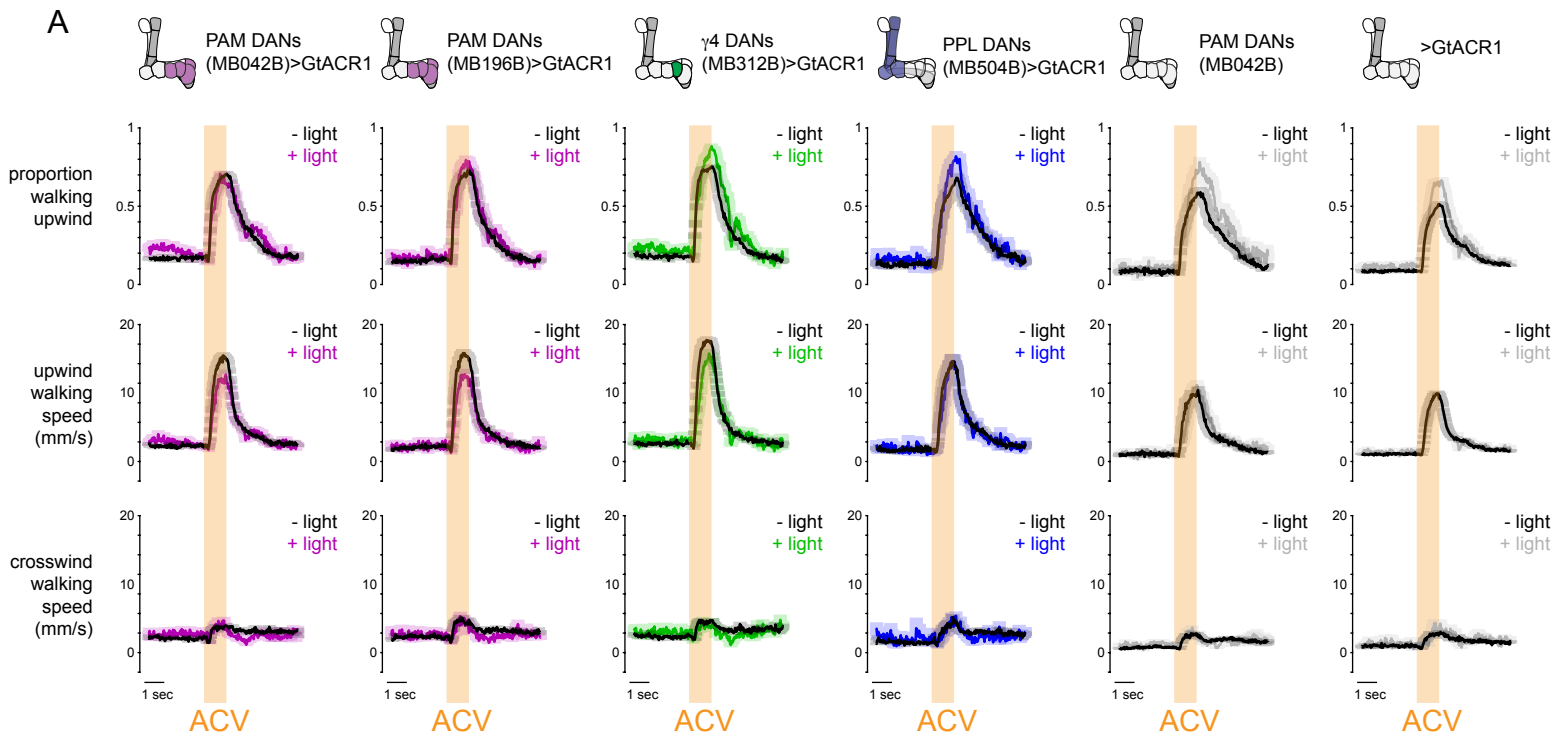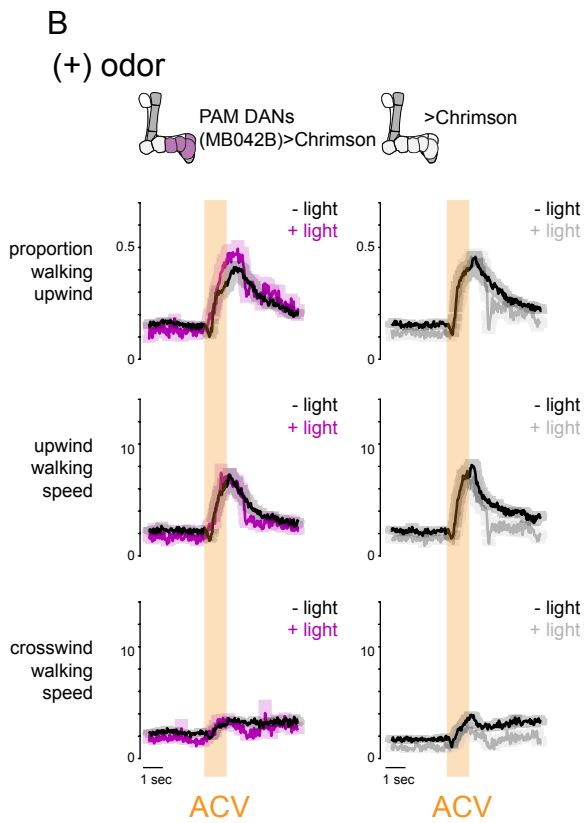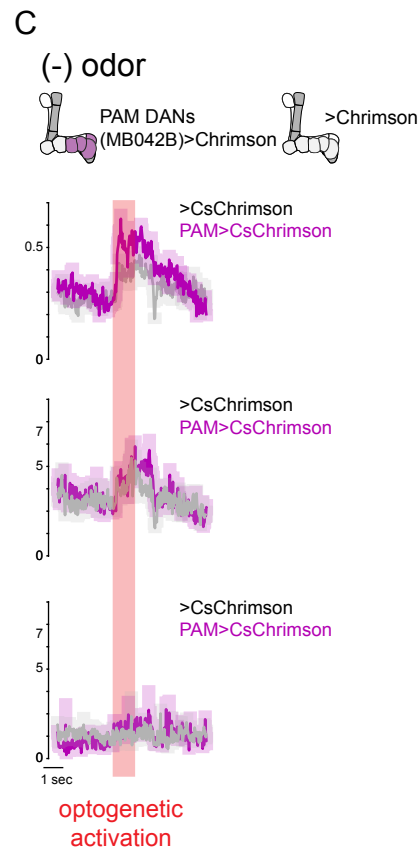

**Supplementary Figure 4. Odor-evoked amenotaxis during optogenetic inhibition or excitation of PAM DANs.** **(A)** Proportion of individuals walking upwind (top row), average upwind walking speed (middle row), and average crosswind walking speed (bottom row),  $\pm$  95% confidence interval (shaded area), of cohorts of animals in the behavioral chambers aligned to odor presentation during trials preceding optogenetic inhibition (-, black) and in the trial paired with optogenetic inhibition (+, colored) for the indicated genotypes in starved animals. PAM DANs (MB042B driver)>GtACR1 (N=63, 1st column), PAM DANs (MB196B driver)>GtACR1 (N=49, 2nd column),  $\gamma$ 4 DANs (MB312B driver)>GtACR1 (N=54, 3rd column), PPL DANs (MB504B driver)>GtACR1 (N=30, 4th column), PAM DANs MB042B-Gal4 parental controls (N=33, 5th column), UAS-GtACR1 parental controls (N=48, 6th column). **(B)** Proportion of individuals walking upwind (top row), average upwind walking speed (middle row), and average crosswind walking speed (bottom row),  $\pm$  95% confidence interval (shaded area), of cohorts of animals in the behavioral chambers aligned to odor presentation during trials preceding optogenetic excitation (-, black) and in the trial paired with optogenetic excitation (+, colored) for the indicated genotypes in fed flies. PAM DANs (MB042B driver)>CsChrimson flies (left) and UAS-Chrimson parental controls (right). N=60 paired cohorts of PAM>CsChrimson and parental control animals assayed together during a single experiment. **(C)** Proportion of individuals walking upwind (top row), average upwind walking speed (middle row), and average crosswind walking speed (bottom row),  $\pm$  95% confidence interval (shaded area), of cohorts of animals in the behavioral chambers aligned to light exposure in PAM DANs (MB042B driver)>CsChrimson flies (magenta) and UAS-CsChrimson parental controls (gray). N=44 paired cohorts.

## Supplementary Table 1: Fly Stocks and Genotypes

### Fly stocks and sources

| Fly Genotype                             | Source                                                                             |
|------------------------------------------|------------------------------------------------------------------------------------|
| UAS-sytGCaMP6s                           | Cohn, R., <i>et al.</i> , <i>Cell</i> <b>163</b> , 1742–1755 (2015).               |
| TH-Gal4                                  | Friggi-Grelin, F., <i>et al.</i> , <i>Genesis</i> <b>35</b> , 260-269 (2003).      |
| DDC-Gal4                                 | Li, H. <i>et al.</i> , <i>Curr Biol.</i> <b>10</b> , 211-214 (2000).               |
| MB247-DsRed                              | Riemensperger, T. <i>et al.</i> , <i>Curr. Biol.</i> <b>15</b> , 1953–1960 (2005). |
| UAS-GCaMP6f                              | Bloomington Stock Center, No. 42747                                                |
| MB247-LexA                               | Pitman, J.L., <i>et al.</i> , <i>Curr. Biol.</i> <b>21</b> , 855–861(2011).        |
| LexAop-GCaMP6s                           | Bloomington Stock Center, No. 53747                                                |
| MB042B                                   | Bloomington Stock Center, No. 68303                                                |
| MB312B                                   | Bloomington Stock Center, No. 68314                                                |
| MB316B                                   | Bloomington Stock Center, No. 68317                                                |
| MB504B                                   | Bloomington Stock Center, No. 68329                                                |
| MB196B                                   | Bloomington Stock Center, No. 68271                                                |
| MB441B                                   | Bloomington Stock Center, No. 68251                                                |
| 20X-UAS-IVS-CsChrimson.mVenus-attP18     | Bloomington Stock Center, No. 55134                                                |
| 20X-UAS-GtACR1.EYFP-attP40               | Mohammad, F., <i>et al.</i> , <i>Nat Methods</i> <b>14</b> , 271–274 (2017).       |
| 58E02-lexA                               | Bloomington Stock Center, No. 52740                                                |
| 13XLexAop2-IVS-NES-jRGECO1a-p10 in attP5 | Bloomington Stock Center, No. 64426                                                |
| 10X-UAS-IVS-Op-dLight1.3b-p10 in attP2   | Gift of Lin Tian, Chuntao Dan, and Vivek Jayaraman                                 |
| OK107-Gal4                               | Bloomington Stock Center, No. 854                                                  |

### Fly genotypes by figure

| Figure                                                                                                                 | Fly Genotype                                                                                                                                                                                                                                                                                                                                                                                                               |
|------------------------------------------------------------------------------------------------------------------------|----------------------------------------------------------------------------------------------------------------------------------------------------------------------------------------------------------------------------------------------------------------------------------------------------------------------------------------------------------------------------------------------------------------------------|
| Figures 1B,C, 2, 3B-F, 4, 5B-E, 6, Extended Data Figures 1B,C, 3A-G, 4, 5, 6, 7, 8, 9, Supplementary Figure 1, 2D,G, 3 | UAS-sytGCaMP6s, MB247(KCs)-DsRed; TH(DAN subset)-Gal4, DDC(DAN subset)-Gal4                                                                                                                                                                                                                                                                                                                                                |
| Figure 1B,D and Extended Data Figure 1B,D                                                                              | UAS-dLight1.3b; OK107(KCs)-Gal4                                                                                                                                                                                                                                                                                                                                                                                            |
| Figure 1E,F                                                                                                            | 58E02(DAN subset)-LexA/LexAop-GCaMP6f; OK107(KCs)-Gal4/UAS-jRGECO                                                                                                                                                                                                                                                                                                                                                          |
| Figure 7A,B                                                                                                            | UAS-GtACR1; 58E02(DAN subset)-p65ADZp; 22E04(DAN subset)-ZpGdbd (MB042B)                                                                                                                                                                                                                                                                                                                                                   |
| Figure 7C, Extended Data Figure 10A, and Supplementary Figure 4A                                                       | UAS-GtACR1; 58E02(DAN subset)-p65ADZp; 22E04(DAN subset)-ZpGdbd (MB042B)<br><br>UAS-GtACR1; 58E02(DAN subset)-p65ADZp; 36B06(DAN subset)-ZpGdbd (MB196B)<br><br>+/+; 58E02(DAN subset)-p65ADZp; 22E04(DAN subset)-ZpGdbd (MB042B)<br><br>UAS-GtACR1; 52H03(DAN subset)-p65ADZp; TH(DAN subset)-ZpGdbd (MB504B)<br><br>UAS-GtACR1; 58E02(DAN subset)-p65ADZp; 10G03(DAN subset)-ZpGdbd (MB312B)<br><br>UAS-GtACR1; +/+; +/+ |
| Figure 7D, Extended Data Figure 10B, and Supplementary Figure 4B,C                                                     | UAS-CsChrimson; 58E02(DAN subset)-p65ADZp; 22E04(DAN subset)-ZpGdbd (MB042B)<br><br>UAS-CsChrimson; +/+; +/+                                                                                                                                                                                                                                                                                                               |
| Extended Data Figure 1F-H (top) and Extended Data Figure 2A,C,E,G:                                                     | 58E02(DAN subset)-p65ADZp/UAS-GCaMP6f; 10G03(DAN subset)-ZpGdbd (MB312B)                                                                                                                                                                                                                                                                                                                                                   |
| Extended Data Figure 1F-H (bottom) and Extended Data Figure 2B,D,F:                                                    | 58E02(DAN subset)-p65ADZp/UAS-GCaMP6f; 93G08 (DAN subset)-ZpGdbd (MB316B)                                                                                                                                                                                                                                                                                                                                                  |
| Extended Data Figure 3H:                                                                                               | MB247(KCs)-LexA/LexAOP-GCaMP6s                                                                                                                                                                                                                                                                                                                                                                                             |

## Supplementary Table 2: Statistical Analyses

### One-way ANOVA followed by Tukey's multiple comparison test.

| Figure                           |         | sum of the squares | degrees of freedom | mean squared error | F-statistic | p-value                   |
|----------------------------------|---------|--------------------|--------------------|--------------------|-------------|---------------------------|
| Figure 2C                        | columns | 1.36046            | 3                  | 0.45349            | 26.08       | 1.17327x10 <sup>-12</sup> |
|                                  | errors  | 1.80873            | 104                | 0.01739            |             |                           |
|                                  | total   | 3.16919            | 107                |                    |             |                           |
| Extended Data Figure 3H          | columns | 0.0002             | 2                  | 0.0001             | 0.18        | 0.8376                    |
|                                  | errors  | 0.0258             | 45                 | 0.00057            |             |                           |
|                                  | total   | 0.026              | 47                 |                    |             |                           |
| Extended Data Figure 4F          | columns | 94.323             | 47.1614            | 1184.31            |             | 1.8246x10 <sup>-196</sup> |
|                                  | errors  | 21.145             | 0.0398             |                    |             |                           |
|                                  | total   | 533                |                    |                    |             |                           |
| Extended Data Figure 4G (left)   | columns | 0.03773            | 4                  | 0.00943            | 204.95      | 6.4872x10 <sup>-77</sup>  |
|                                  | errors  | 0.01128            | 245                | 0.00005            |             |                           |
|                                  | total   | 0.04901            | 249                |                    |             |                           |
| Extended Data Figure 4G (middle) | columns | 0.584              | 4                  | 0.146              | 396.21      | 1.139010 <sup>-105</sup>  |
|                                  | errors  | 0.09028            | 245                | 0.00037            |             |                           |
|                                  | total   | 0.67427            | 249                |                    |             |                           |
| Extended Data Figure 4G (right)  | columns | 0.0456             | 4                  | 0.0114             | 327.43      | 5.1709x10 <sup>-97</sup>  |
|                                  | errors  | 0.00853            | 245                | 0.00003            |             |                           |
|                                  | total   | 0.05413            | 249                |                    |             |                           |

### Pearson Correlation Coefficient

| Figure    | context                       | variable 1                | variable 2                           | correlation coefficient (r) | p-value                |
|-----------|-------------------------------|---------------------------|--------------------------------------|-----------------------------|------------------------|
| Figure 1F | spontaneous movement          | $\gamma$ 4 DAN GCaMP      | $\gamma$ 4 KC dLight                 | 0.8716                      | <10 <sup>-20</sup>     |
| Figure 1F | spontaneous movement          | $\gamma$ 5 DAN GCaMP      | $\gamma$ 5 KC dLight                 | 0.8649                      | <10 <sup>-20</sup>     |
| Figure 3C | low airflow                   | upwind displacement       | $\Delta$  heading                    | -0.5900                     | 9x10 <sup>-15</sup>    |
|           | low airflow                   | upwind displacement       | $\Delta$ forward velocity            | 0.3129                      | 0.0001                 |
| Figure 3F | low airflow                   | upwind displacement       | $\gamma$ 2 $\Delta$ F/F <sub>o</sub> | -0.3464                     | 2.25x10 <sup>-5</sup>  |
|           | low airflow                   | upwind displacement       | $\gamma$ 3 $\Delta$ F/F <sub>o</sub> | -0.1953                     | 0.0194                 |
|           | low airflow                   | upwind displacement       | $\gamma$ 4 $\Delta$ F/F <sub>o</sub> | 0.4971                      | 2.7x10 <sup>-10</sup>  |
|           | low airflow                   | $\Delta$  heading         | $\gamma$ 2 $\Delta$ F/F <sub>o</sub> | 0.3501                      | 1.8x10 <sup>-5</sup>   |
|           | low airflow                   | $\Delta$  heading         | $\gamma$ 3 $\Delta$ F/F <sub>o</sub> | 0.1586                      | 0.0585                 |
|           | low airflow                   | $\Delta$  heading         | $\gamma$ 4 $\Delta$ F/F <sub>o</sub> | -0.5582                     | 4.37x10 <sup>-13</sup> |
|           | low airflow                   | $\Delta$ forward velocity | $\gamma$ 2 $\Delta$ F/F <sub>o</sub> | 0.1561                      | 0.0627                 |
|           | low airflow                   | $\Delta$ forward velocity | $\gamma$ 3 $\Delta$ F/F <sub>o</sub> | 0.1518                      | 0.0703                 |
|           | low airflow                   | $\Delta$ forward velocity | $\gamma$ 4 $\Delta$ F/F <sub>o</sub> | 0.0906                      | 0.2821                 |
| Figure 4B | high airflow                  | upwind displacement       | $\Delta$  heading                    | -0.5849                     | 5.28x10 <sup>-6</sup>  |
|           | high airflow                  | upwind displacement       | $\Delta$ forward velocity            | 0.7758                      | 1.4x10 <sup>-11</sup>  |
| Figure 4D | high airflow                  | upwind displacement       | $\gamma$ 2 $\Delta$ F/F <sub>o</sub> | -0.2522                     | 0.0712                 |
|           | high airflow                  | upwind displacement       | $\gamma$ 3 $\Delta$ F/F <sub>o</sub> | -0.1082                     | 0.4451                 |
|           | high airflow                  | upwind displacement       | $\gamma$ 4 $\Delta$ F/F <sub>o</sub> | 0.4670                      | 0.0005                 |
|           | high airflow                  | $\Delta$  heading         | $\gamma$ 2 $\Delta$ F/F <sub>o</sub> | 0.0892                      | 0.5294                 |
|           | high airflow                  | $\Delta$  heading         | $\gamma$ 3 $\Delta$ F/F <sub>o</sub> | 0.1180                      | 0.4049                 |
|           | high airflow                  | $\Delta$  heading         | $\gamma$ 4 $\Delta$ F/F <sub>o</sub> | -0.2978                     | 0.0320                 |
|           | high airflow                  | $\Delta$ forward velocity | $\gamma$ 2 $\Delta$ F/F <sub>o</sub> | -0.3840                     | 0.005                  |
|           | high airflow                  | $\Delta$ forward velocity | $\gamma$ 3 $\Delta$ F/F <sub>o</sub> | -0.1199                     | 0.3973                 |
|           | high airflow                  | $\Delta$ forward velocity | $\gamma$ 4 $\Delta$ F/F <sub>o</sub> | 0.6143                      | 1.27x10 <sup>-6</sup>  |
| Figure 5B | low airflow (model-generated) | upwind displacement       | $\gamma$ 2 (z score)                 | -0.7702                     | <10 <sup>-15</sup>     |
|           | low airflow (model-generated) | upwind displacement       | $\gamma$ 3 (z score)                 | -0.5079                     | 9.5x10 <sup>-11</sup>  |
|           | low airflow (model-generated) | upwind displacement       | $\gamma$ 4 (z score)                 | 0.8461                      | <10 <sup>-15</sup>     |
|           | low airflow (model-generated) | heading                   | $\gamma$ 2 (z score)                 | 0.9160                      | <10 <sup>-15</sup>     |



|           |                                |                               |                      |         |                       |
|-----------|--------------------------------|-------------------------------|----------------------|---------|-----------------------|
|           | low airflow (model-generated)  | heading                       | $\gamma_3$ (z score) | 0.6577  | $<10^{-15}$           |
|           | low airflow (model-generated)  | heading                       | $\gamma_4$ (z score) | -0.8575 | $<10^{-15}$           |
|           | low airflow (model-generated)  | forward velocity (normalized) | $\gamma_2$ (z score) | 0.0649  | 0.4415                |
|           | low airflow (model-generated)  | forward velocity (normalized) | $\gamma_3$ (z score) | 0.2952  | $3.4 \times 10^{-4}$  |
|           | low airflow (model-generated)  | forward velocity (normalized) | $\gamma_4$ (z score) | 0.4426  | $3.1 \times 10^{-8}$  |
|           | low airflow (experimental)     | upwind displacement           | $\gamma_2$ (z score) | -0.4187 | $1.9 \times 10^{-7}$  |
|           | low airflow (experimental)     | upwind displacement           | $\gamma_3$ (z score) | -0.2376 | 0.0043                |
|           | low airflow (experimental)     | upwind displacement           | $\gamma_4$ (z score) | 0.4431  | $3.0 \times 10^{-8}$  |
|           | low airflow (experimental)     | heading                       | $\gamma_2$ (z score) | 0.4475  | $2.1 \times 10^{-8}$  |
|           | low airflow (experimental)     | heading                       | $\gamma_3$ (z score) | 0.1802  | 0.0313                |
|           | low airflow (experimental)     | heading                       | $\gamma_4$ (z score) | -0.4669 | $4.2 \times 10^{-9}$  |
|           | low airflow (experimental)     | forward velocity (normalized) | $\gamma_2$ (z score) | 0.1932  | 0.0208                |
|           | low airflow (experimental)     | forward velocity (normalized) | $\gamma_3$ (z score) | 0.0748  | 0.37451               |
|           | low airflow (experimental)     | forward velocity (normalized) | $\gamma_4$ (z score) | 0.0929  | 0.2700                |
| Figure 5C | high airflow (model-generated) | upwind displacement           | $\gamma_2$ (z score) | -0.2481 | 0.1178                |
|           | high airflow (model-generated) | upwind displacement           | $\gamma_3$ (z score) | -0.6631 | $2.3 \times 10^{-6}$  |
|           | high airflow (model-generated) | upwind displacement           | $\gamma_4$ (z score) | 0.8198  | $5.5 \times 10^{-11}$ |
|           | high airflow (model-generated) | heading                       | $\gamma_2$ (z score) | -0.5405 | 0.00026               |
|           | high airflow (model-generated) | heading                       | $\gamma_3$ (z score) | 0.0483  | 0.7644                |
|           | high airflow (model-generated) | heading                       | $\gamma_4$ (z score) | -0.1276 | 0.4267                |
|           | high airflow (model-generated) | forward velocity (normalized) | $\gamma_2$ (z score) | -0.6027 | $3.0 \times 10^{-5}$  |
|           | high airflow (model-generated) | forward velocity (normalized) | $\gamma_3$ (z score) | 0.7369  | $3.9 \times 10^{-8}$  |
|           | high airflow (model-generated) | forward velocity (normalized) | $\gamma_4$ (z score) | 0.9558  | $<10^{-15}$           |
|           | high airflow (experimental)    | upwind displacement           | $\gamma_2$ (z score) | -0.1866 | 0.1854                |
|           | high airflow (experimental)    | upwind displacement           | $\gamma_3$ (z score) | -0.0960 | 0.4982                |
|           | high airflow (experimental)    | upwind displacement           | $\gamma_4$ (z score) | 0.4354  | 0.0013                |
|           | high airflow (experimental)    | heading                       | $\gamma_2$ (z score) | -0.1264 | 0.3721                |

|                      |                             |                               |                                       |                |                         |
|----------------------|-----------------------------|-------------------------------|---------------------------------------|----------------|-------------------------|
|                      | high airflow (experimental) | heading                       | $\gamma_3$ (z score)                  | -0.1095        | 0.4395                  |
|                      | high airflow (experimental) | heading                       | $\gamma_4$ (z score)                  | -0.2100        | 0.1352                  |
|                      | high airflow (experimental) | forward velocity (normalized) | $\gamma_2$ (z score)                  | -0.4766        | 0.00035                 |
|                      | high airflow (experimental) | forward velocity (normalized) | $\gamma_3$ (z score)                  | -0.2575        | 0.0653                  |
|                      | high airflow (experimental) | forward velocity (normalized) | $\gamma_4$ (z score)                  | 0.5407         | $3.5 \times 10^{-5}$    |
| Figure 6D            | low airflow – starved       | heading                       | $\gamma_2$ (z score)                  | 0.2213         | 0.0920                  |
|                      | low airflow – starved       | heading                       | $\gamma_3$ (z score)                  | -0.1454        | 0.2720                  |
|                      | low airflow – starved       | heading                       | $\gamma_4$ (z score)                  | -0.4038        | 0.0015                  |
|                      | low airflow – starved       | forward velocity (normalized) | $\gamma_2$ (z score)                  | 0.0897         | 0.4992                  |
|                      | low airflow – starved       | forward velocity (normalized) | $\gamma_3$ (z score)                  | -0.0158        | 0.9056                  |
|                      | low airflow – starved       | forward velocity (normalized) | $\gamma_4$ (z score)                  | 0.3200         | 0.0135                  |
|                      | low airflow – fed           | heading                       | $\gamma_2$ (z score)                  | 0.1218         | 0.3851                  |
|                      | low airflow – fed           | heading                       | $\gamma_3$ (z score)                  | -0.0287        | 0.8382                  |
|                      | low airflow – fed           | heading                       | $\gamma_4$ (z score)                  | -0.4878        | 0.0002                  |
|                      | low airflow – fed           | forward velocity (normalized) | $\gamma_2$ (z score)                  | -0.3341        | 0.0145                  |
|                      | low airflow – fed           | forward velocity (normalized) | $\gamma_3$ (z score)                  | -0.2219        | 0.1102                  |
|                      | low airflow – fed           | forward velocity (normalized) | $\gamma_4$ (z score)                  | -0.1562        | 0.2640                  |
|                      | Extended Data Figure 3D     | spontaneous movement          | $\gamma_2 \Delta F/F_o$               | net motion     | -0.1306                 |
| spontaneous movement |                             | $\gamma_2 \Delta F/F_o$       | forward velocity                      | -0.1791        | $4.8059 \times 10^{-9}$ |
| spontaneous movement |                             | $\gamma_2 \Delta F/F_o$       | turning velocity                      | -0.0220        | 0.4750                  |
| spontaneous movement |                             | $\gamma_2 \Delta F/F_o$       | lateral velocity                      | 0.1586         | $2.2866 \times 10^{-7}$ |
| spontaneous movement |                             | $\gamma_2 \Delta F/F_o$       | time on treadmill                     | 0.0053         | 0.8643                  |
| spontaneous movement |                             | $\gamma_2 \Delta F/F_o$       | proportion of time moving after start | 0.0463         | 0.1331                  |
| spontaneous movement |                             | $\gamma_2 \Delta F/F_o$       | bout length                           | 0.0012         | 0.9694                  |
| spontaneous movement |                             | $\gamma_2 \Delta F/F_o$       | stop length                           | 0.0552         | 0.0952                  |
| spontaneous movement |                             | $\gamma_4 \Delta F/F_o$       | net motion                            | -0.0012        | 0.9690                  |
| spontaneous movement |                             | $\gamma_4 \Delta F/F_o$       | forward velocity                      | 0.1266         | $3.8097 \times 10^{-5}$ |
| spontaneous movement |                             | $\gamma_4 \Delta F/F_o$       | turning velocity                      | -0.07230607973 | 0.0189                  |
| spontaneous movement |                             | $\gamma_4 \Delta F/F_o$       | lateral velocity                      | -0.15236373    | $6.7872 \times 10^{-7}$ |
| spontaneous movement |                             | $\gamma_4 \Delta F/F_o$       | time on treadmill                     | -0.1549        | $4.3851 \times 10^{-7}$ |
| spontaneous movement |                             | $\gamma_4 \Delta F/F_o$       | proportion of time moving after start | 0.0828         | 0.0072                  |
| spontaneous movement |                             | $\gamma_4 \Delta F/F_o$       | bout length                           | 0.0551         | 0.0738                  |
| spontaneous movement |                             | $\gamma_4 \Delta F/F_o$       | stop length                           | -0.0190        | 0.5668                  |

|                                 |                                 |                                 |                                 |               |               |
|---------------------------------|---------------------------------|---------------------------------|---------------------------------|---------------|---------------|
| Extended Data<br>Figure 3E      | spontaneous movement            | $\gamma_2 \Delta F/F_0$         | $\gamma_3 \Delta F/F_0$         | 0.2411        | $<10x^{-15}$  |
|                                 | spontaneous movement            | $\gamma_2 \Delta F/F_0$         | $\gamma_4 \Delta F/F_0$         | -0.6254       | $<10x^{-15}$  |
|                                 | spontaneous movement            | $\gamma_3 \Delta F/F_0$         | $\gamma_4 \Delta F/F_0$         | -0.0178       | 0.5633        |
| Extended Data<br>Figure 4H      | spontaneous movement            | net motion                      | $\gamma_2-\gamma_3$             | 0.0305        | $<10x^{-15}$  |
|                                 | spontaneous movement            | net motion                      | $\gamma_2-\gamma_4$             | 0.0191        | $<10x^{-15}$  |
|                                 | spontaneous movement            | net motion                      | $\gamma_3-\gamma_4$             | -0.0394       | $<10x^{-15}$  |
|                                 | spontaneous movement            | forward velocity                | $\gamma_2-\gamma_3$             | -0.0151       | $<10x^{-15}$  |
|                                 | spontaneous movement            | forward velocity                | $\gamma_2-\gamma_4$             | -0.0269       | $<10x^{-15}$  |
|                                 | spontaneous movement            | forward velocity                | $\gamma_3-\gamma_4$             | -0.0271       | $<10x^{-15}$  |
|                                 | spontaneous movement            | angular velocity                | $\gamma_2-\gamma_3$             | 0.0155        | $<10x^{-15}$  |
|                                 | spontaneous movement            | angular velocity                | $\gamma_2-\gamma_4$             | 0.0161        | $<10x^{-15}$  |
|                                 | spontaneous movement            | angular velocity                | $\gamma_3-\gamma_4$             | -0.0181       | $<10x^{-15}$  |
| Extended Data<br>Figure 5A      | low airflow                     | upwind displacement             | $\gamma_2 \Delta F/F_0$         | -0.0589       | 0.4845        |
|                                 | low airflow                     | upwind displacement             | $\gamma_3 \Delta F/F_0$         | 0.0505        | 0.5494        |
|                                 | low airflow                     | upwind displacement             | $\gamma_4 \Delta F/F_0$         | 0.0201        | 0.8113        |
|                                 | low airflow                     | $\Delta \text{heading} $        | $\gamma_2 \Delta F/F_0$         | 0.1120        | 0.1829        |
|                                 | low airflow                     | $\Delta \text{heading} $        | $\gamma_3 \Delta F/F_0$         | -0.1090       | 0.1950        |
|                                 | low airflow                     | $\Delta \text{heading} $        | $\gamma_4 \Delta F/F_0$         | -0.1730       | 0.0388        |
|                                 | low airflow                     | $\Delta\text{forward velocity}$ | $\gamma_2 \Delta F/F_0$         | -0.0924       | 0.2725        |
|                                 | low airflow                     | $\Delta\text{forward velocity}$ | $\gamma_3 \Delta F/F_0$         | -0.0653       | 0.4384        |
| low airflow                     | $\Delta\text{forward velocity}$ | $\gamma_4 \Delta F/F_0$         | 0.3200                          | $9.8x10^{-5}$ |               |
| Extended Data<br>Figure 5B      | low airflow                     | upwind displacement             | $\Delta \text{heading} $        | -0.6831       | $<10^{-15}$   |
|                                 |                                 | upwind displacement             | $\Delta\text{forward velocity}$ | 0.0139        | 0.8694        |
| Extended Data<br>Figure 5C      | low airflow                     | net displacement                | $\gamma_2 \Delta F/F_0$         | -0.1337       | 0.1115        |
|                                 | low airflow                     | net displacement                | $\gamma_3 \Delta F/F_0$         | -0.2526       | 0.0023        |
|                                 | low airflow                     | net displacement                | $\gamma_4 \Delta F/F_0$         | 0.2322        | 0.0053        |
|                                 | low airflow                     | total distance                  | $\gamma_2 \Delta F/F_0$         | 0.1441        | 0.0930        |
|                                 | low airflow                     | total distance                  | $\gamma_3 \Delta F/F_0$         | -0.0701       | 0.4154        |
|                                 | low airflow                     | total distance                  | $\gamma_4 \Delta F/F_0$         | -0.0615       | 0.4751        |
| Extended Data<br>Figure 5D      | low airflow                     | $\gamma_2 \Delta F/F_0$         | $\gamma_4 \Delta F/F_0$         | -0.6233       | $<10x^{-15}$  |
| Extended Data<br>Figure 5E      | high airflow                    | upwind displacement             | $\gamma_2 \Delta F/F_0$         | -0.2689       | 0.0539        |
|                                 |                                 | upwind displacement             | $\gamma_3 \Delta F/F_0$         | 0.0625        | 0.6596        |
|                                 |                                 | upwind displacement             | $\gamma_4 \Delta F/F_0$         | 0.0440        | 0.7566        |
|                                 |                                 | $\Delta \text{heading} $        | $\gamma_2 \Delta F/F_0$         | 0.1411        | 0.3183        |
|                                 |                                 | $\Delta \text{heading} $        | $\gamma_3 \Delta F/F_0$         | 0.0563        | 0.6918        |
|                                 |                                 | $\Delta \text{heading} $        | $\gamma_4 \Delta F/F_0$         | 0.1212        | 0.3922        |
|                                 |                                 | $\Delta\text{forward velocity}$ | $\gamma_2 \Delta F/F_0$         | -0.0481       | 0.7349        |
|                                 |                                 | $\Delta\text{forward velocity}$ | $\gamma_3 \Delta F/F_0$         | -0.0934       | 0.5076        |
| $\Delta\text{forward velocity}$ | $\gamma_4 \Delta F/F_0$         | 0.2497                          | 0.0742                          |               |               |
| Extended Data<br>Figure 5F      | high airflow                    | upwind displacement             | $\Delta \text{heading} $        | -0.3582       | 0.009         |
|                                 |                                 | upwind displacement             | $\Delta\text{forward velocity}$ | 0.0978        | 0.4903        |
| Extended Data<br>Figure 5H      | low airflow (down-sampled)      | upwind displacement             | $\gamma_2 \Delta F/F_0$         | -0.2785       | 0.0013        |
|                                 | low airflow (down-sampled)      | upwind displacement             | $\gamma_3 \Delta F/F_0$         | 0.1517        | 0.0849        |
|                                 | low airflow (down-sampled)      | upwind displacement             | $\gamma_4 \Delta F/F_0$         | 0.4418        | $1.4x10^{-7}$ |

|                         |                               |                                 |                         |         |                        |
|-------------------------|-------------------------------|---------------------------------|-------------------------|---------|------------------------|
|                         | low airflow (down-sampled)    | $\Delta \text{heading} $        | $\gamma_2 \Delta F/F_o$ | 0.2218  | 0.01121                |
|                         | low airflow (down-sampled)    | $\Delta \text{heading} $        | $\gamma_3 \Delta F/F_o$ | 0.0459  | 0.6044                 |
|                         | low airflow (down-sampled)    | $\Delta \text{heading} $        | $\gamma_4 \Delta F/F_o$ | -0.5009 | $1.3 \times 10^{-9}$   |
|                         | low airflow (down-sampled)    | $\Delta\text{forward velocity}$ | $\gamma_2 \Delta F/F_o$ | 0.1654  | 0.0600                 |
|                         | low airflow (down-sampled)    | $\Delta\text{forward velocity}$ | $\gamma_3 \Delta F/F_o$ | 0.0978  | 0.2685                 |
|                         | low airflow (down-sampled)    | $\Delta\text{forward velocity}$ | $\gamma_4 \Delta F/F_o$ | 0.06213 | 0.4826                 |
| Extended Data Figure 5I | high airflow (down-sampled)   | upwind displacement             | $\gamma_2 \Delta F/F_o$ | -0.1573 | 0.2753                 |
|                         | high airflow (down-sampled)   | upwind displacement             | $\gamma_3 \Delta F/F_o$ | 0.1187  | 0.4115                 |
|                         | high airflow (down-sampled)   | upwind displacement             | $\gamma_4 \Delta F/F_o$ | 0.3685  | 0.0085                 |
|                         | high airflow (down-sampled)   | $\Delta \text{heading} $        | $\gamma_2 \Delta F/F_o$ | -0.0843 | 0.5604                 |
|                         | high airflow (down-sampled)   | $\Delta \text{heading} $        | $\gamma_3 \Delta F/F_o$ | 0.1344  | 0.3521                 |
|                         | high airflow (down-sampled)   | $\Delta \text{heading} $        | $\gamma_4 \Delta F/F_o$ | -0.0621 | 0.6683                 |
|                         | high airflow (down-sampled)   | $\Delta\text{forward velocity}$ | $\gamma_2 \Delta F/F_o$ | -0.2705 | 0.0574                 |
|                         | high airflow (down-sampled)   | $\Delta\text{forward velocity}$ | $\gamma_3 \Delta F/F_o$ | -0.1429 | 0.3221                 |
|                         | high airflow (down-sampled)   | $\Delta\text{forward velocity}$ | $\gamma_4 \Delta F/F_o$ | 0.4909  | 0.0003                 |
| Extended Data Figure 6E | low airflow (model-generated) | upwind displacement             | $\gamma_2$ (z score)    | 0.0525  | 0.5336                 |
|                         | low airflow (model-generated) | upwind displacement             | $\gamma_3$ (z score)    | 0.1855  | 0.0266                 |
|                         | low airflow (model-generated) | upwind displacement             | $\gamma_4$ (z score)    | 0.5029  | $1.54 \times 10^{-10}$ |
|                         | low airflow (model-generated) | $ \text{heading} $              | $\gamma_2$ (z score)    | 0.0431  | 0.6090                 |
|                         | low airflow (model-generated) | $ \text{heading} $              | $\gamma_3$ (z score)    | -0.1591 | 0.0577                 |
|                         | low airflow (model-generated) | $ \text{heading} $              | $\gamma_4$ (z score)    | -0.4843 | $8.8 \times 10^{-10}$  |
|                         | low airflow (model-generated) | forward velocity (normalized)   | $\gamma_2$ (z score)    | 0.2109  | 0.0115                 |

|                         |                                    |                               |                      |         |                          |
|-------------------------|------------------------------------|-------------------------------|----------------------|---------|--------------------------|
|                         | low airflow (model-generated)      | forward velocity (normalized) | $\gamma_3$ (z score) | 0.5873  | $1.3 \times 10^{-14}$    |
|                         | low airflow (model-generated)      | forward velocity (normalized) | $\gamma_4$ (z score) | 0.8363  | $< 10^{-15}$             |
| Extended Data Figure 6F | high airflow (model-generated)     | upwind displacement           | $\gamma_2$ (z score) | 0.6067  | $2.6 \times 10^{-5}$     |
|                         | high airflow (model-generated)     | upwind displacement           | $\gamma_3$ (z score) | 0.7328  | $5.1 \times 10^{-8}$     |
|                         | high airflow (model-generated)     | upwind displacement           | $\gamma_4$ (z score) | 0.2690  | 0.1000                   |
|                         | high airflow (model-generated)     | heading                       | $\gamma_2$ (z score) | -0.4791 | 0.0015                   |
|                         | high airflow (model-generated)     | heading                       | $\gamma_3$ (z score) | 0.4219  | 0.0060                   |
|                         | high airflow (model-generated)     | heading                       | $\gamma_4$ (z score) | 0.7814  | $1.6 \times 10^{-9}$     |
|                         | high airflow (model-generated)     | forward velocity (normalized) | $\gamma_2$ (z score) | 0.4797  | 0.0015                   |
|                         | high airflow (model-generated)     | forward velocity (normalized) | $\gamma_3$ (z score) | 0.8794  | $3.9 \times 10^{-14}$    |
|                         | high airflow (model-generated)     | forward velocity (normalized) | $\gamma_4$ (z score) | 0.5274  | 0.0004                   |
| Extended Data Figure 9B | fed, low airflow (model-generated) | upwind displacement           | $\gamma_2$ (z score) | -0.2060 | 0.1143                   |
|                         | fed, low airflow (model-generated) | upwind displacement           | $\gamma_3$ (z score) | 0.0756  | 0.5658                   |
|                         | fed, low airflow (model-generated) | upwind displacement           | $\gamma_4$ (z score) | 0.5416  | $7.9 \times 10^{-6}$     |
|                         | fed, low airflow (model-generated) | heading                       | $\gamma_2$ (z score) | -0.0822 | 0.5323                   |
|                         | fed, low airflow (model-generated) | heading                       | $\gamma_3$ (z score) | -0.5078 | $3.5 \times 10^{-5}$     |
|                         | fed, low airflow (model-generated) | heading                       | $\gamma_4$ (z score) | -0.9408 | $< 10^{-15}$             |
|                         | fed, low airflow (model-generated) | forward velocity (normalized) | $\gamma_2$ (z score) | -0.7913 | $5.3 \times 10^{-14}$    |
|                         | fed, low airflow (model-generated) | forward velocity (normalized) | $\gamma_3$ (z score) | -0.7416 | $1.2 \times 10^{-11}$    |
|                         | fed, low airflow (model-generated) | forward velocity (normalized) | $\gamma_4$ (z score) | 0.0473  | 0.7199                   |
| Supplementary Figure 1C | spontaneous movement               | $\gamma_2 \Delta F/F_0$       | PC1                  | -0.1421 | $3.4316 \times 10^{-6}$  |
|                         | spontaneous movement               | $\gamma_2 \Delta F/F_0$       | PC2                  | -0.0017 | 0.9556                   |
|                         | spontaneous movement               | $\gamma_2 \Delta F/F_0$       | PC3                  | 0.1013  | $9.5351 \times 10^{-4}$  |
|                         | spontaneous movement               | $\gamma_2 \Delta F/F_0$       | PC4                  | 0.1939  | $1.9212 \times 10^{-10}$ |

|                         |                      |                         |     |         |                          |
|-------------------------|----------------------|-------------------------|-----|---------|--------------------------|
| Supplementary Figure 1D | spontaneous movement | $\gamma_4 \Delta F/F_0$ | PC1 | -0.0542 | 0.0780                   |
|                         | spontaneous movement | $\gamma_4 \Delta F/F_0$ | PC2 | 0.0208  | 0.4994                   |
|                         | spontaneous movement | $\gamma_4 \Delta F/F_0$ | PC3 | -0.1250 | $4.4914 \times 10^{-5}$  |
|                         | spontaneous movement | $\gamma_4 \Delta F/F_0$ | PC4 | -0.1980 | $7.8424 \times 10^{-11}$ |

**Pearson Correlation Coefficient (filter swapping experiments)**

| Figure                  | filter       | data set     | variable 1                      | variable 2                    | slope (m) | correlation coefficient (r) | p-value                |
|-------------------------|--------------|--------------|---------------------------------|-------------------------------|-----------|-----------------------------|------------------------|
| Extended Data Figure 6A | high airflow | low airflow  | $\gamma_2$ activity (predicted) | heading                       | -0.5632   | -0.6902779                  | $1.48 \times 10^{21}$  |
|                         | high airflow | low airflow  | $\gamma_2$ activity (predicted) | forward velocity (normalized) | -0.7301   | -0.3205581                  | $9.49 \times 10^{-05}$ |
| Extended Data Figure 6C | high airflow | low airflow  | $\gamma_3$ activity (predicted) | heading                       | -0.1070   | -0.3852256                  | $2.03 \times 10^{-06}$ |
|                         | high airflow | low airflow  | $\gamma_3$ activity (predicted) | forward velocity (normalized) | -0.3251   | -0.4193544                  | $1.86 \times 10^{-07}$ |
| Figure 5D               | high airflow | low airflow  | $\gamma_4$ activity (predicted) | heading                       | -0.1831   | -0.2480579                  | 0.0028                 |
|                         | high airflow | low airflow  | $\gamma_4$ activity (predicted) | forward velocity (normalized) | 1.609     | 0.7808                      | $1.33 \times 10^{-30}$ |
| Extended Data Figure 6B | low airflow  | high airflow | $\gamma_2$ activity (predicted) | heading                       | 0.5119    | 0.8154                      | $8.52 \times 10^{-11}$ |
|                         | low airflow  | high airflow | $\gamma_2$ activity (predicted) | forward velocity (normalized) | 0.0959    | 0.14284                     | 0.3729                 |
| Extended Data Figure 6D | low airflow  | high airflow | $\gamma_3$ activity (predicted) | heading                       | 0.0721    | 0.2547                      | 0.1081                 |
|                         | low airflow  | high airflow | $\gamma_3$ activity (predicted) | forward velocity (normalized) | 0.1638    | 0.5417                      | $2.52 \times 10^{-4}$  |
| Figure 5E               | low airflow  | high airflow | $\gamma_4$ activity (predicted) | heading                       | -0.7750   | -0.7014                     | $3.25 \times 10^{-07}$ |
|                         | low airflow  | high airflow | $\gamma_4$ activity (predicted) | forward velocity (normalized) | 0.8961    | 0.7588                      | $9.01 \times 10^{-09}$ |
| Extended Data Figure 9C | fed          | starved      | $\gamma_2$ activity (predicted) | heading                       | -0.0111   | -0.0284                     | 0.7360                 |
|                         | fed          | starved      | $\gamma_2$ activity (predicted) | forward velocity (normalized) | -0.7563   | -0.6910                     | $1.28 \times 10^{-21}$ |
| Extended Data Figure 9E | fed          | starved      | $\gamma_3$ activity (predicted) | heading                       | -0.1186   | -0.3779                     | $3.26 \times 10^{-06}$ |
|                         | fed          | starved      | $\gamma_3$ activity (predicted) | forward velocity (normalized) | -0.6395   | -0.7302                     | $4.32 \times 10^{-25}$ |
| Extended Data Figure 9G | fed          | starved      | $\gamma_4$ activity (predicted) | heading                       | -0.5179   | -0.8722                     | $1.23 \times 10^{-45}$ |
|                         | fed          | starved      | $\gamma_4$ activity (predicted) | forward velocity (normalized) | -0.0088   | -0.0053                     | 0.9497                 |
| Extended Data Figure 9D | fed          | starved      | $\gamma_2$ activity (predicted) | heading                       | 0.5212    | 0.9694                      | $4.52 \times 10^{-37}$ |
|                         | fed          | starved      | $\gamma_2$ activity (predicted) | forward velocity (normalized) | 0.0784    | 0.0431                      | 0.7439                 |
| Extended Data Figure 9F | fed          | starved      | $\gamma_3$ activity (predicted) | heading                       | 0.1451    | 0.8462                      | $1.70 \times 10^{-17}$ |
|                         | fed          | starved      | $\gamma_3$ activity (predicted) | forward velocity (normalized) | 0.1492    | 0.2570                      | 0.0475                 |

|                         |     |         |                                 |                               |         |         |                        |
|-------------------------|-----|---------|---------------------------------|-------------------------------|---------|---------|------------------------|
| Extended Data Figure 9H | fed | starved | $\gamma_4$ activity (predicted) | heading                       | -0.6083 | -0.9366 | $4.32 \times 10^{-28}$ |
|                         | fed | starved | $\gamma_4$ activity (predicted) | forward velocity (normalized) | 0.8330  | 0.3788  | 0.0028                 |

#### Fisher r-to-z transformation (within contexts)

| Figure    | correlation 1                                   | correlation 1                           | z-score | p-value  |
|-----------|-------------------------------------------------|-----------------------------------------|---------|----------|
| Figure 3C | upwind displacement - $\Delta$ forward velocity | upwind displacement - $\Delta$  heading | -8.38   | <0.00001 |
| Figure 3F | upwind displacement - $\gamma_2$                | $\Delta$ forward velocity - $\gamma_2$  | -4.34   | <0.00001 |
|           | upwind displacement - $\gamma_2$                | $\Delta$  heading  - $\gamma_2$         | -6.08   | <0.00001 |
|           | $\Delta$ forward velocity - $\gamma_2$          | $\Delta$  heading  - $\gamma_2$         | 1.74    | 0.0409   |
|           | upwind displacement - $\gamma_3$                | $\Delta$ forward velocity - $\gamma_3$  | -2.94   | 0.0016   |
|           | upwind displacement - $\gamma_3$                | $\Delta$  heading  - $\gamma_3$         | -2.99   | 0.0014   |
|           | $\Delta$ forward velocity - $\gamma_3$          | $\Delta$  heading  - $\gamma_3$         | -0.06   | 0.4761   |
|           | upwind displacement - $\gamma_4$                | $\Delta$ forward velocity - $\gamma_4$  | 3.8     | 0.0001   |
|           | upwind displacement - $\gamma_4$                | $\Delta$  heading  - $\gamma_4$         | 9.84    | <0.00001 |
| Figure 4B | $\Delta$ forward velocity - $\gamma_4$          | $\Delta$  heading  - $\gamma_4$         | -6.03   | <0.00001 |
|           | upwind displacement - $\Delta$ forward velocity | upwind displacement - $\Delta$  heading | -7.43   | <0.00001 |
| Figure 4D | upwind displacement - $\gamma_2$                | $\Delta$ forward velocity - $\gamma_2$  | 0.64    | 0.2611   |
|           | upwind displacement - $\gamma_2$                | $\Delta$  heading  - $\gamma_2$         | -1.51   | 0.0655   |
|           | $\Delta$ forward velocity - $\gamma_2$          | $\Delta$  heading  - $\gamma_2$         | -2.15   | 0.0158   |
|           | upwind displacement - $\gamma_3$                | $\Delta$ forward velocity - $\gamma_3$  | 0.05    | 0.4801   |
|           | upwind displacement - $\gamma_3$                | $\Delta$  heading  - $\gamma_3$         | -0.99   | 0.1611   |
|           | $\Delta$ forward velocity - $\gamma_3$          | $\Delta$  heading  - $\gamma_3$         | -1.04   | 0.1492   |
|           | upwind displacement - $\gamma_4$                | $\Delta$ forward velocity - $\gamma_4$  | -0.91   | 0.1814   |
|           | upwind displacement - $\gamma_4$                | $\Delta$  heading  - $\gamma_4$         | 3.55    | 0.0002   |
|           | $\Delta$ forward velocity - $\gamma_4$          | $\Delta$  heading  - $\gamma_4$         | 4.46    | <0.00001 |

#### Fisher r-to-z transformation (across contexts)

| Figure           | variable 1                    | variable 2                  | context        | z-score | p-value |
|------------------|-------------------------------|-----------------------------|----------------|---------|---------|
| Figures 3C vs 4B | upwind displacement           | $\Delta$ (forward velocity) | low vs high    | -3.89   | 0.0001  |
|                  | upwind displacement           | $\Delta$ ( heading )        | low vs high    | -0.04   | 0.484   |
| Figures 3F vs 4D | upwind displacement           | $\gamma_2 \Delta F/F_0$     | low vs high    | -0.57   | 0.2843  |
|                  | upwind displacement           | $\gamma_3 \Delta F/F_0$     | low vs high    | -0.49   | 0.3121  |
|                  | upwind displacement           | $\gamma_4 \Delta F/F_0$     | low vs high    | 0.21    | 0.4168  |
|                  | $\Delta$ ( heading )          | $\gamma_2 \Delta F/F_0$     | low vs high    | 1.51    | 0.0655  |
|                  | $\Delta$ ( heading )          | $\gamma_3 \Delta F/F_0$     | low vs high    | 0.23    | 0.409   |
|                  | $\Delta$ ( heading )          | $\gamma_4 \Delta F/F_0$     | low vs high    | -1.77   | 0.0384  |
|                  | $\Delta$ (forward velocity)   | $\gamma_2 \Delta F/F_0$     | low vs high    | 3.07    | 0.0011  |
|                  | $\Delta$ (forward velocity)   | $\gamma_3 \Delta F/F_0$     | low vs high    | 1.5     | 0.0668  |
|                  | $\Delta$ (forward velocity)   | $\gamma_4 \Delta F/F_0$     | low vs high    | -3.42   | 0.0003  |
| Figure 6D        | heading                       | $\gamma_2$ (z score)        | starved vs fed | 0.5     | 0.3085  |
|                  | heading                       | $\gamma_3$ (z score)        | starved vs fed | -0.58   | 0.281   |
|                  | heading                       | $\gamma_4$ (z score)        | starved vs fed | 0.51    | 0.305   |
|                  | forward velocity (normalized) | $\gamma_2$ (z score)        | starved vs fed | 2.14    | 0.0162  |
|                  | forward velocity (normalized) | $\gamma_3$ (z score)        | starved vs fed | 1.03    | 0.1515  |
|                  | forward velocity (normalized) | $\gamma_4$ (z score)        | starved vs fed | 2.39    | 0.0084  |

#### Fisher r-to-z transformation (across contexts)

| Figure     | variable 1                    | variable 2           | context                             | z-score | p-value  |
|------------|-------------------------------|----------------------|-------------------------------------|---------|----------|
| Figures 5B | upwind displacement           | $\gamma_2$ (z score) | model vs experimental (low airflow) | -4.81   | <0.00001 |
|            | upwind displacement           | $\gamma_3$ (z score) |                                     | -2.66   | 0.0039   |
|            | upwind displacement           | $\gamma_4$ (z score) |                                     | 6.41    | <0.00001 |
|            | heading                       | $\gamma_2$ (z score) |                                     | 9.05    | <0.00001 |
|            | heading                       | $\gamma_3$ (z score) |                                     | 5.07    | <0.00001 |
|            | heading                       | $\gamma_4$ (z score) |                                     | -6.51   | <0.00001 |
|            | forward velocity (normalized) | $\gamma_2$ (z score) |                                     | -1.09   | 0.1379   |

|                                      |                               |                      |                                      |                                          |          |        |
|--------------------------------------|-------------------------------|----------------------|--------------------------------------|------------------------------------------|----------|--------|
|                                      | forward velocity (normalized) | $\gamma_3$ (z score) |                                      | 1.92                                     | 0.0274   |        |
|                                      | forward velocity (normalized) | $\gamma_4$ (z score) |                                      | 3.2                                      | 0.0007   |        |
| Figures 5C                           | upwind displacement           | $\gamma_2$ (z score) | model vs experimental (high airflow) | -0.28                                    | 0.3897   |        |
|                                      | upwind displacement           | $\gamma_3$ (z score) |                                      | -3.06                                    | 0.0011   |        |
|                                      | upwind displacement           | $\gamma_4$ (z score) |                                      | 3.01                                     | 0.0013   |        |
|                                      | [heading]                     | $\gamma_2$ (z score) |                                      | -2.08                                    | 0.0188   |        |
|                                      | [heading]                     | $\gamma_3$ (z score) |                                      | 0.69                                     | 0.2451   |        |
|                                      | [heading]                     | $\gamma_4$ (z score) |                                      | 0.37                                     | 0.3557   |        |
|                                      | forward velocity (normalized) | $\gamma_2$ (z score) |                                      | -0.78                                    | 0.2177   |        |
|                                      | forward velocity (normalized) | $\gamma_3$ (z score) |                                      | 5.26                                     | <0.00001 |        |
| forward velocity (normalized)        | $\gamma_4$ (z score)          | 5.62                 | <0.00001                             |                                          |          |        |
| Extended Data Figure 6A vs 6B        | [heading]                     | $\gamma_2$ (z score) | swapped filters                      | -16.66                                   | <0.00001 |        |
|                                      | forward velocity (normalized) | $\gamma_2$ (z score) |                                      | -3.98                                    | <0.00001 |        |
| Extended Data Figure 6C vs 6D        | [heading]                     | $\gamma_3$ (z score) |                                      | -5.58                                    | <0.00001 |        |
|                                      | forward velocity (normalized) | $\gamma_3$ (z score) |                                      | -8.81                                    | <0.00001 |        |
| Figures 5D vs 5E                     | [heading]                     | $\gamma_4$ (z score) |                                      | 5.16                                     | <0.00001 |        |
|                                      | forward velocity (normalized) | $\gamma_4$ (z score) |                                      | 0.45                                     | 0.3264   |        |
| Figure 6D vs Extended Data Figure 9B | [heading]                     | $\gamma_2$ (z score) |                                      | model vs experimental (fed, low airflow) | 0.4      | 0.3446 |
|                                      | [heading]                     | $\gamma_3$ (z score) |                                      |                                          | 0.66     | 0.2546 |
|                                      | [heading]                     | $\gamma_4$ (z score) | -0.02                                |                                          | 0.492    |        |
|                                      | forward velocity (normalized) | $\gamma_2$ (z score) | -2.81                                |                                          | 0.0025   |        |
|                                      | forward velocity (normalized) | $\gamma_3$ (z score) | -4.5                                 |                                          | <0.00001 |        |
|                                      | forward velocity (normalized) | $\gamma_4$ (z score) | -6.83                                |                                          | <0.00001 |        |
| Extended Data Figure 9C vs 9D        | [heading]                     | $\gamma_2$ (z score) | swapped filters                      | -10.55                                   | <0.00001 |        |
|                                      | forward velocity (normalized) | $\gamma_2$ (z score) |                                      | -4.46                                    | <0.00001 |        |
| Extended Data Figure 9E vs 9F        | [heading]                     | $\gamma_3$ (z score) |                                      | -12.4                                    | <0.00001 |        |
|                                      | forward velocity (normalized) | $\gamma_3$ (z score) |                                      | -4.86                                    | <0.00001 |        |
| Extended Data Figure 9G vs 9H        | [heading]                     | $\gamma_4$ (z score) |                                      | 1.84                                     | 0.0329   |        |
|                                      | forward velocity (normalized) | $\gamma_4$ (z score) |                                      | -2.02                                    | 0.0217   |        |

### Nested Linear Model

| Figure                  | DAN         | context      | odor             | factors          | residual variance | F-statistic | p-value    |
|-------------------------|-------------|--------------|------------------|------------------|-------------------|-------------|------------|
| Extended Data Figure 8B | $\gamma_2$  | low airflow  | + odor (ACV)     | none             | 0.0403787         | NaN         | NaN        |
|                         |             |              |                  | $h_o$            | 0.03760409        | 6.34548863  | 0.01361784 |
|                         |             |              |                  | $\Delta V_{1-4}$ | 0.0351768         | 5.86522439  | 0.01756883 |
|                         |             |              |                  | $\Delta h_{1-4}$ | 0.0346849         | 1.19128277  | 0.27819172 |
|                         | $\gamma_2$  | low airflow  | - odor (air)     | none             | 0.03079687        | 10.4785484  | 0.00173631 |
|                         |             |              |                  | $h_o$            | 0.02869513        | NaN         | NaN        |
|                         |             |              |                  | $h_o$            | 0.02868193        | 0.04004464  | 0.84186034 |
|                         |             |              |                  | $\Delta V_{1-4}$ | 0.02864149        | 0.12142365  | 0.72834712 |
|                         | $\gamma_2$  | low airflow  | + odor (ACV)     | none             | 0.02791286        | 2.21881958  | 0.14003855 |
|                         |             |              |                  | $h_o$            | 0.02791286        | 0.06469075  | 0.7998516  |
|                         |             |              |                  | $\Delta h_{1-4}$ | 0.02789138        | NaN         | NaN        |
|                         |             |              |                  | $\Delta h_{4-7}$ | 0.02789138        | NaN         | NaN        |
|                         | $\gamma_3$  | low airflow  | + odor (ACV)     | none             | 0.01925491        | 2.18899949  | 0.14265348 |
|                         |             |              |                  | $h_o$            | 0.01877697        | 2.18899949  | 0.14265348 |
| $\Delta V_{1-4}$        |             |              |                  | 0.01877463       | 0.01056944        | 0.91835769  |            |
| $\Delta h_{1-4}$        |             |              |                  | 0.0187071        | 0.303232          | 0.58332487  |            |
| $\gamma_3$              | low airflow | - odor (air) | none             | 0.0165204        | 10.986201         | 0.00136227  |            |
|                         |             |              | $h_o$            | 0.02476782       | NaN               | NaN         |            |
|                         |             |              | $h_o$            | 0.02475873       | 0.03194851        | 0.85855629  |            |
|                         |             |              | $\Delta V_{1-4}$ | 0.02365998       | 3.99375853        | 0.04882803  |            |



|                         |              |              |                  |                  |            |            |                       |
|-------------------------|--------------|--------------|------------------|------------------|------------|------------|-----------------------|
|                         |              |              |                  | $\Delta h_{1-4}$ | 0.02298707 | 2.48827356 | 0.1184121             |
|                         |              |              |                  | $\Delta h_{4-7}$ | 0.02289354 | 0.3431666  | 0.55957776            |
|                         | $\gamma 4$   | low airflow  | + odor (ACV)     | none             | 0.09468233 | NaN        | NaN                   |
|                         |              |              |                  | $h_o$            | 0.09169558 | 2.801236   | 0.0104504             |
|                         |              |              |                  | $\Delta V_{1-4}$ | 0.08485019 | 6.85747434 | 0.0104504             |
|                         |              |              |                  | $\Delta h_{1-4}$ | 0.07185056 | 15.1977827 | 0.0001941             |
|                         |              |              |                  | $\Delta h_{4-7}$ | 0.06623637 | 7.03506999 | 0.00957401            |
|                         | $\gamma 4$   | low airflow  | - odor (air)     | none             | 0.03801041 | NaN        | NaN                   |
|                         |              |              |                  | $h_o$            | 0.03719132 | 1.91606339 | 0.16983177            |
|                         |              |              |                  | $\Delta V_{1-4}$ | 0.03419821 | 7.52692833 | 0.00739658            |
|                         |              |              |                  | $\Delta h_{1-4}$ | 0.03419806 | 0.0003621  | 0.98486264            |
|                         |              |              |                  | $\Delta h_{4-7}$ | 0.0341292  | 0.16947248 | 0.6816296             |
| Extended Data Figure 8C | $\gamma 2$   | high airflow | + odor (ACV)     | none             | 0.0541142  | NaN        | NaN                   |
|                         |              |              |                  | $h_o$            | 0.05392805 | 0.1311693  | 0.71922917            |
|                         |              |              |                  | $\Delta V_{1-4}$ | 0.03265512 | 24.1033708 | $1.87 \times 10^{-5}$ |
|                         |              |              |                  | $\Delta h_{1-4}$ | 0.03240844 | 0.2740167  | 0.60385762            |
|                         |              |              |                  | $\Delta h_{4-7}$ | 0.0323156  | 0.10054644 | 0.75305869            |
|                         | $\gamma 2$   | high airflow | - odor (air)     | none             | 0.02734259 | NaN        | NaN                   |
|                         |              |              |                  | $h_o$            | 0.02332821 | 6.36705479 | 0.01605225            |
|                         |              |              |                  | $\Delta V_{1-4}$ | 0.02318236 | 0.22649725 | 0.63700885            |
|                         |              |              |                  | $\Delta h_{1-4}$ | 0.02271852 | 0.71458193 | 0.40366891            |
|                         |              |              |                  | $\Delta h_{4-7}$ | 0.0227161  | 0.00362774 | 0.9523245             |
|                         | $\gamma 3$   | high airflow | + odor (ACV)     | none             | 0.02061051 | NaN        | NaN                   |
|                         |              |              |                  | $h_o$            | 0.01906929 | 3.07124704 | 0.08775449            |
|                         |              |              |                  | $\Delta V_{1-4}$ | 0.01906849 | 0.00155187 | 0.96878828            |
|                         |              |              |                  | $\Delta h_{1-4}$ | 0.01881729 | 0.48057828 | 0.49260912            |
|                         |              |              |                  | $\Delta h_{4-7}$ | 0.01869893 | 0.22153756 | 0.64079109            |
|                         | $\gamma 3$   | high airflow | - odor (air)     | none             | 0.01536549 | NaN        | NaN                   |
|                         |              |              |                  | $h_o$            | 0.01513746 | 0.55735452 | 0.46004583            |
|                         |              |              |                  | $\Delta V_{1-4}$ | 0.01433653 | 2.0111824  | 0.16474248            |
|                         |              |              |                  | $\Delta h_{1-4}$ | 0.01430721 | 0.07173626 | 0.79039754            |
|                         |              |              |                  | $\Delta h_{4-7}$ | 0.01361378 | 1.73182213 | 0.19698253            |
|                         | $\gamma 4$   | high airflow | + odor (ACV)     | none             | 0.15558791 | NaN        | NaN                   |
|                         |              |              |                  | $h_o$            | 0.14598583 | 2.49941493 | 0.1221775             |
|                         |              |              |                  | $\Delta V_{1-4}$ | 0.07066354 | 39.4393612 | $2.62 \times 10^{-7}$ |
|                         |              |              |                  | $\Delta h_{1-4}$ | 0.0669172  | 2.01544606 | 0.16430746            |
|                         |              |              | $\Delta h_{4-7}$ | 0.06381549       | 1.701153   | 0.20064965 |                       |
| $\gamma 4$              | high4airflow | - odor (air) | none             | 0.03775205       | NaN        | NaN        |                       |
|                         |              |              | $h_o$            | 0.03624028       | 1.54346557 | 0.22191945 |                       |
|                         |              |              | $\Delta V_{1-4}$ | 0.03281815       | 3.75392147 | 0.06055977 |                       |
|                         |              |              | $\Delta h_{1-4}$ | 0.03277167       | 0.04963495 | 0.8249948  |                       |
|                         |              |              | $\Delta h_{4-7}$ | 0.03229766       | 0.49899509 | 0.48475498 |                       |

#### Paired t-test

| Figure                  | variable                   | context 1    | context 2         | condition    | p-value                 |
|-------------------------|----------------------------|--------------|-------------------|--------------|-------------------------|
| Figure 6B               | upwind displacement        | starved      | fed               | + odor (ACV) | 0.0051                  |
|                         | heading                    | starved      | fed               | + odor (ACV) | 0.0062                  |
|                         | forward velocity           | starved      | fed               | + odor (ACV) | 0.0062                  |
| Figure 6C               | $\gamma 2 \Delta F/F_o$    | starved      | fed               | + odor (ACV) | 0.0012                  |
|                         | $\gamma 3 \Delta F/F_o$    | starved      | fed               | + odor (ACV) | 0.1309                  |
|                         | $\gamma 4 \Delta F/F_o$    | starved      | fed               | + odor (ACV) | 0.0045                  |
| Extended Data Figure 1B | $\gamma 2$ DAN activity    | movement     | sucrose ingestion | - odor (ACV) | $2.6633 \times 10^{-8}$ |
|                         | $\gamma 3$ DAN activity    | movement     | sucrose ingestion | - odor (ACV) | $1.6860 \times 10^{-6}$ |
|                         | $\gamma 4$ DAN activity    | movement     | sucrose ingestion | - odor (ACV) | $3.0386 \times 10^{-7}$ |
|                         | $\gamma 5$ DAN activity    | movement     | sucrose ingestion | - odor (ACV) | $2.3978 \times 10^{-7}$ |
| Extended Data Figure 1B | $\gamma 2$ dLight activity | movement     | sucrose ingestion | - odor (ACV) | $2.2463 \times 10^{-4}$ |
|                         | $\gamma 3$ dLight activity | movement     | sucrose ingestion | - odor (ACV) | 0.0038                  |
|                         | $\gamma 4$ dLight activity | movement     | sucrose ingestion | - odor (ACV) | 0.0085                  |
|                         | $\gamma 5$ dLight activity | movement     | sucrose ingestion | - odor (ACV) | $2.6509 \times 10^{-5}$ |
| Supplementary Figure 3D | upwind displacement        | + odor (ACV) | - odor (air)      | low airflow  | 0.2646                  |
| Supplementary Figure 3D | upwind displacement        | + odor (ACV) | - odor (air)      | high airflow | .3567                   |

|                          |                     |         |     |              |        |
|--------------------------|---------------------|---------|-----|--------------|--------|
| Supplementary Figure 30E | upwind displacement | starved | fed | - odor (air) | 0.0248 |
| Supplementary Figure 3E  | [heading]           | starved | fed | - odor (air) | 0.3878 |
| Supplementary Figure 3E  | forward velocity    | starved | fed | - odor (air) | 0.0031 |

#### Paired t-test: freely moving flies

| Figure                   | variable            | context 1 | context 2 | condition    | genotype                            | p-value                  |
|--------------------------|---------------------|-----------|-----------|--------------|-------------------------------------|--------------------------|
| Figure 7C                | upwind displacement | + light   | - light   | + odor (ACV) | PAM DANs (MB042B driver)>GtACR1     | 1.0982x10 <sup>-13</sup> |
|                          | upwind displacement | + light   | - light   | + odor (ACV) | PAM DANs (MB196B driver)>GtACR1     | 1.3864x10 <sup>-7</sup>  |
|                          | upwind displacement | + light   | - light   | + odor (ACV) | PPL DANs (MB504B driver)>GtACR1     | 0.7843                   |
|                          | upwind displacement | + light   | - light   | + odor (ACV) | γ4 DANs (MB312B driver)>GtACR1      | 1.9723x10 <sup>-5</sup>  |
|                          | upwind displacement | + light   | - light   | + odor (ACV) | PAM DANs MB042B-Gal4                | 0.7582                   |
|                          | upwind displacement | + light   | - light   | + odor (ACV) | UAS-GtACR1                          | 0.6725                   |
| Figure 7D                | upwind displacement | + light   | - light   | + odor (ACV) | PAM DANs (MB042B driver)>CsChrimson | 4.4321x10 <sup>-6</sup>  |
|                          | upwind displacement | + light   | - light   | + odor (ACV) | UAS-CsChrimson                      | 0.6258                   |
|                          | upwind displacement | + light   | - light   | - odor (air) | PAM DANs (MB042B driver)>CsChrimson | 3.7168x10 <sup>-6</sup>  |
|                          | upwind displacement | + light   | - light   | - odor (air) | UAS-CsChrimson                      | 0.0637                   |
| Extended Data Figure 10A | upwind speed        | + light   | - light   | + odor (ACV) | PAM DANs (MB042B driver)>GtACR1     | 1.6375x10 <sup>-15</sup> |
|                          | upwind speed        | + light   | - light   | + odor (ACV) | PAM DANs (MB196B driver)>GtACR1     | 4.2441x10 <sup>-9</sup>  |
|                          | upwind speed        | + light   | - light   | + odor (ACV) | PPL DANs (MB504B driver)>GtACR1     | 0.1123                   |
|                          | upwind speed        | + light   | - light   | + odor (ACV) | γ4 DANs (MB312B driver)>GtACR1      | 2.6248x10 <sup>-10</sup> |
|                          | upwind speed        | + light   | - light   | + odor (ACV) | PAM DANs MB042B-Gal4                | 0.0667                   |
|                          | upwind speed        | + light   | - light   | + odor (ACV) | UAS-GtACR1                          | 0.0047                   |
| Extended Data Figure 10B | upwind speed        | + light   | - light   | + odor (ACV) | PAM DANs (MB042B driver)>CsChrimson | 0.1789                   |
|                          | upwind speed        | + light   | - light   | + odor (ACV) | UAS-CsChrimson                      | 0.1087                   |
|                          | upwind speed        | + light   | - light   | - odor (air) | PAM DANs (MB042B driver)>CsChrimson | 3.6551x10 <sup>-6</sup>  |
|                          | upwind speed        | + light   | - light   | - odor (air) | UAS-CsChrimson                      | 0.0461                   |

#### Unpaired t-test: freely moving flies

| Figure                  | variable                  | context 1 | context 2 | condition    | p-value                  |
|-------------------------|---------------------------|-----------|-----------|--------------|--------------------------|
| Supplementary Figure 2F | upwind displacement       | starved   | fed       | + odor (ACV) | 8.0850x10 <sup>-7</sup>  |
|                         | proportion walking upwind | starved   | fed       | + odor (ACV) | 2.2979x10 <sup>-10</sup> |
|                         | upwind speed              | starved   | fed       | + odor (ACV) | 2.1660x10 <sup>-5</sup>  |

#### Two-sample F-test for equal variances

| Figure                  | dataset 1                                      | dataset 2                          | context      | p-value |
|-------------------------|------------------------------------------------|------------------------------------|--------------|---------|
| Extended Data Figure 5H | upwind displacement (low airflow, downsampled) | upwind displacement (high airflow) | + odor (ACV) | 0.1787  |

|                         |                                                 |                                          |              |                           |
|-------------------------|-------------------------------------------------|------------------------------------------|--------------|---------------------------|
|                         | heading  (low airflow, downsampled)             | $\Delta$  heading  (high airflow)        | + odor (ACV) | 0.0876                    |
|                         | forward velocity (low airflow, downsampled)     | $\Delta$ forward velocity (high airflow) | + odor (ACV) | 0.0053                    |
| Extended Data Figure 5I | upwind displacement (high airflow, downsampled) | upwind displacement (low airflow)        | + odor (ACV) | 0.3654                    |
|                         | heading  (high airflow, downsampled)            | $\Delta$  heading  (low airflow)         | + odor (ACV) | $8.3 \times 10^{-4}$      |
|                         | forward velocity (high airflow, downsampled)    | $\Delta$ forward velocity (low airflow)  | + odor (ACV) | 0.053                     |
| Supplementary Figure 3A | heading  in odor                                | heading  in air                          | low airflow  | 0.1318                    |
| Supplementary Figure 3A | forward velocity in odor                        | forward velocity in air                  | low airflow  | 0.0508                    |
| Supplementary Figure 3B | heading  in odor                                | heading  in air                          | high airflow | 0.0991                    |
| Supplementary Figure 3B | forward velocity in odor                        | forward velocity in air                  | high airflow | 0.0764                    |
| Supplementary Figure 3C | heading  (low airflow)                          | heading  (high airflow)                  | + odor (ACV) | $8.1881 \times 10^{-195}$ |
| Supplementary Figure 3C | forward velocity (low airflow)                  | forward velocity (high airflow)          | + odor (ACV) | $2.3662 \times 10^{-89}$  |
